# Supplementary material for: Diversity of Feeding in Anthozoa (Cnidaria): A Systematic Review
Source: Preprints.org preprint supplement (doi:10.20944/preprints202009.0396.v1), 2020-09-17
Supplement: Supplementary file 1 [file supplementary]

**Supplementary material**

**Table S1 - List of studies examined in this review.**

| **STUDY** | **APPROACH(ES)** | **SUBCLASS** | **ORDER** | **FAMILY, GENUS and/or SPECIES** |
| --- | --- | --- | --- | --- |
| Abe N (1938) Feeding behaviour and the nematocyst of *Fungia* and 15 other species of corals. Stud. Palao Trop. Biol. 1:469-521. | **FEEDING BEHAVIOR** | **HEXACORALLIA** | **SCLERACTINIA** | *Fungia* |
| Acuña FH, Zamponi MO (1995) Feeding ecology of intertidal sea anemones (Cnidaria, Actiniaria): food sources and trophic parameters. Biociencias 3:73–84. | **FEEDING HABITS/ECOLOGY** | **HEXACORALLIA** | **ACTINIARIA** | *Phymactis clematis*; *Aulactinia marplatensis*; *Aulactinia reynaudi* |
| Acuña FH, Zamponi MO (1996) Ecología trófica de las anémonas intermareales *Phymactis clematis* (Dana, 1849); *Aulactinia marplatensis* (Zamponi, 1977) y *A. reynaudi* (Milne-Edwards, 1857) (Actiniaria: Actiniidae): relaciones entre las anémonas y sus presas. Ciencias Marinas, vol. 22(4):397–413. | **FEEDING HABITS/ECOLOGY** | **HEXACORALLIA** | **ACTINIARIA** | *Phymactis clematis*; *Aulactinia marplatensis*; *Aulactinia reynaudi* |
| Acuña FH, Excoffon AC, Zamponi MO (1999) Population Structure, Sex Ratio and Feeding in *Tricnidactis errans* Pires, 1988 (Actiniaria, Haliplanellidae) from a Subtidal Aggregation. Biociências 7(2):3–12. | **FEEDING HABITS/ECOLOGY** | **HEXACORALLIA** | **ACTINIARIA** | *Tricnidactis errans* |
| Acuña FH, Zamponi MO (1999) Estructura poblacional y ecologia trófica de *Oulactis muscosa* Dana, 1849 (Actiniaria, Actiniidae) del litoral bonaerense (Argentina). Physis 57:11–16. | **FEEDING HABITS/ECOLOGY** | **HEXACORALLIA** | **ACTINIARIA** | *Oulactis muscosa* |
| Acuña FH, Excoffon AC, Genzano GN (2001) Feeding of *Anthothoe chilensis* (Actiniaria, Sagartiidae) in Mar del Plata Port. (Buenos Aires, Argentina). Biociencias 9(1):111–120. | **FEEDING HABITS/ECOLOGY** | **HEXACORALLIA** | **ACTINIARIA** | *Anthothoe chilensis* |
| Acuña FH, Excoffon AC, Zamponi MO, Genzano GN (2004) Feeding habits of the temperate octocoral *Tripalea clavaria* (Studer, 1878) (Octocorallia, Gorgonaria, Anthothelidae), from sublittoral outcrops off Mar del Plata, Argentina. Belg J Zool 134(1):65–66. | **FEEDING HABITS/ECOLOGY** | **OCTOCORALLIA** | **ALCYONACEA** | *Tripalea clavaria* |

| Agostini S, Suzuki Y, Higuchi T, Casareto BE, Yoshinaga K, Nakano Y, Fujimura H (2012) Biological and chemical characteristics of the coral gastric cavity. Coral Reefs 31:147–156 | **PHYSIOLOGY** | **HEXACORALLIA** | **SCLERACTINIA** | *Galaxea fascicularis* |
| --- | --- | --- | --- | --- |
| Alamaru A, Bronstein O, Dishon G, Loya Y (2009) Opportunistic feeding by the fungiid coral *Fungia scruposa* on the moon jellyfish *Aurelia aurita*. Coral Reefs 28(4):865–865.  https://doi.org/10.1007/s00338-009-0507-7 | **FEEDING BEHAVIOR** | **HEXACORALLIA** | **SCLERACTINIA** | *Fungia scruposa (Danafungia scruposa)* |
| Anthony KRN (1997) Prey Capture by Sea Anemone *Metridium senile* (L.): Effects of Body Size, Flow Regime, and Upstream Neighbors. Biol Bull 192(1): 73–86. | **FEEDING BEHAVIOR** | **HEXACORALLIA** | **ACTINIARIA** | *Metridium senile* |
| Anthony KRN (1999) Coral suspension feeding on fine particulate matter*.* J Exp Mar Biol Ecol 232(1):85–106. | **FEEDING BEHAVIOR/PHYSIOLOGY** | **HEXACORALLIA** | **SCLERACTINIA** | *Pocillopora damicornis*; *Montipora digitata*; *Acropora millepora*; *Porites cylindrica.* |
| Arai MN, Walder GL (1973) The feeding response of *Pachycerianthus fimbriatus* (Ceriantharia). Comp Biochem Physiol Part A: Mol Integr Physiol 44(4):1085–1092. https://doi.org/10.1016/0300-9629(73)90246-6 | **FEEDING BEHAVIOR/PHYSIOLOGY** | **CERIANTHARIA** | **SPIRULARIA** | *Pachycerianthus fimbriatus* |
| Arai MN (1985) Electrical activity associated with withdrawal and feeding of *Pachycerianthus fimbriatus* (Anthozoa, Ceriantharia). Mar Behav Physiol 12(1):47–56.  https://doi.org/10.1080/10236248509378632 | **FEEDING BEHAVIOR/PHYSIOLOGY** | **CERIANTHARIA** | **SPIRULARIA** | *Pachycerianthus fimbriatus* |
| Ayre DJ (1984) The Sea Anemone *Actinia tenebrosa.* An Opportunistic Insectivore. Ophelia 23(2):149–153. https://doi.org/10.1080/00785326.1984.10426610 | **FEEDING HABITS/ECOLOGY** | **HEXACORALLIA** | **ACTINIARIA** | *Actinia tenebrosa*; *Actinia equina* |
| Bak RPM, Joenje M, de Jong I, Lambrechts DYM, Nieuwland G (1998) Bacterial suspension feeding by coral reef benthic organisms. Mar Ecol Prog Ser 175: 85–288. | **PHYSIOLOGY** | **HEXACORALLIA** | **SCLERACTINIA** | *Madracis mirabilis* |
| Best BA (1988) Passive suspension feeding in a sea pen: effects of ambient flow on volume flow rate and filtering efficiency. Biol Bull 175(3):332–342.  https://doi.org/10.2307/1541723 | **FEEDING BEHAVIOR** | **OCTOCORALLIA** | **PENNATULACEA** | *Ptilosarcus gurneyi* |

| Bos AR, Mueller B, Gumanao GS (2011) Feeding biology and symbiotic relationships of the Corallimorpharian *Paracorynactis hoplites* (Anthozoa: Hexacorallia). Raffles Bull Zool 59(2):245–250. | **FEEDING BEHAVIOR** | **HEXACORALLIA** | **CORALLIMORPHARIA** | *Paracorynactis hoplites* |
| --- | --- | --- | --- | --- |
| Boschma H (1925). The nature of the association between Anthozoa and Zooxanthellae. PNAS 11(1):65–67. | **FEEDING BEHAVIOR** | **HEXACORALLIA** | **SCLERACTINIA** | *Astrangia* |
| Boschma H (1925) On the feeding reactions and digestion in the coral polyp *Astrangia danae,* with notes on its symbiosis with zooxanthellae. Biol Bull 49:407–439. https://doi.org/10.2307/1536652 | **FEEDING BEHAVIOR/PHYSIOLOGY** | **HEXACORALLIA** | **SCLERACTINIA** | *Astrangia danae* |
| Bumann D (1995) Localization of digestion activities in the sea anemone *Haliplanella luciae*. Biol Bull 189(2):236–237. https://doi.org/10.1086/bblv189n2p236 | **PHYSIOLOGY** | **HEXACORALLIA** | **ACTINIARIA** | *Haliplanella luciae* |
| Bursey CR, Guanciale JM (1977) Feeding behavior of the sea anemone *Condylactis gigantea*. Comp Biochem Physiol Part A 57(1):115–117. | **FEEDING BEHAVIOR** | **HEXACORALLIA** | **ACTINIARIA** | *Condylactis gigantea* |
| Carpenter FW (1910) Feeding reactions of the rose coral (*Isophyllia*). Proc Am Acad Arts Sci 46(6):149–162. | **FEEDING BEHAVIOR/PHYSIOLOGY** | **HEXACORALLIA** | **SCLERACTINIA** | *Isophyllia sinuosa* |
| Chang-Feng D, Ming-Chao L (1993) The effects of flow on feeding of three gorgonians from southern Taiwan. J Exp Mar Biol Ecol 173(1):57–69. https://doi.org/10.1016/0022-0981(93)90207-5 | **FEEDING BEHAVIOR** | **OCTOCORALLIA** | **ALCYONACEA** | *Subergorgia suberosa*; *Melithaea ochracea*; *Acanthogorgia vegae* |
| Chintiroglou C, Koukouras A (1991) Observations on the feeding habits of *Calliactis parasitica* (Couch, 1842), Anthozoa, Cnidaria. Oceanol Acta 14(4):389–396. | **FEEDING HABITS/ECOLOGY** | **HEXACORALLIA** | **ACTINIARIA** | *Calliactis parasitica* |

| Chintiroglou C, Koukouras A (1992) The feeding habits of three Mediterranean Sea anemone species, *Anemonia viridis* (Forskål), *Actinia equina* (Linnaeus) and *Cereus pedunculatus* (Pennant). Helgol Meeresunters vol. 46(1): 53–68.  https://doi.org/10.1007/bf02366212 | **FEEDING HABITS/ECOLOGY** | **HEXACORALLIA** | **ACTINIARIA** | *Anemonia viridis*; *Actinia equina*; *Cereus pedunculatus* |
| --- | --- | --- | --- | --- |
| Chintiroglou C-C, Valkouma T, Culley M (1996) Allometry of feeding and body size in a population of the sea anemone *Paranemonia vouliagmeniensis*. J Mar Biol Assoc UK 76(03):603–616.  https://doi.org/10.1017/s0025315400031313 | **FEEDING BEHAVIOR/FEEDING HABITS/ECOLOGY** | **HEXACORALLIA** | **ACTINIARIA** | *Paranemonia vouliagmeniensis* |
| Chomsky O, Kamenir Y, Hyams M, Dubinsky Z, Chadwick-Furman NE (2004) Effects of feeding regime on growth rate in the Mediterranean Sea anemone *Actinia equina* (Linnaeus). J Exp Mar Biol Ecol 299(2):217–229.  https://doi.org/10.1016/j.jembe.2003.09.009 | **FEEDING HABITS/ECOLOGY** | **HEXACORALLIA** | **ACTINIARIA** | *Actinia equina* |
| Clayton WS, Lasker HR (1982) Effects of light and dark treatments on feeding by the reef coral Pocillopora damicornis (Linnaeus). J Exp Mar Biol Ecol 63(3):269–279. https://doi.org/10.1016/0022-0981(82)90183-6 | **PHYSIOLOGY** | **HEXACORALLIA** | **SCLERACTINIA** | *Pocillopora damicornis* |
| Clayton WS, Lasker HR (1984) Host feeding regime and zooxanthellal photosynthesis in the anemone, *Aiptasia pallida* (Verrill). Biol Bull 167(3):590–600. https://doi.org/10.2307/1541412 | **PHYSIOLOGY** | **HEXACORALLIA** | **ACTINIARIA** | *Aiptasia pallida* |
| Coffroth MA (1984) Ingestion and incorporation of coral mucus aggregates by a gorgonian soft coral. Mar Ecol Prog Ser 17(2):193–199. | **PHYSIOLOGY** | **OCTOCORALLIA** | **ALCYONACEA** | *Pseudoplexaura porosa* |
| Coles SL (1969) Quantitative estimates of feeding and respiration for three scleractinian corals. Limnol Oceanogr 14:949–953. | **PHYSIOLOGY** | **HEXACORALLIA** | **SCLERACTINIA** | *Manicina areolata*; *Montastrea cavernosa*; *Porites porites* |
| Coma R, Gili JM, Zabala M, Riera T (1994) Feeding and prey capture cycles in the aposymbiotic gorgonian *Paramuricea clavate.* Mar Ecol Prog Ser 115:257–270. | **FEEDING BEHAVIOR** | **OCTOCORALLIA** | **ALCYONACEA** | *Paramuricea clavata* |

| Conlan JA, Humphrey CA, Severati A, Francis DS (2017) Influence of different feeding regimes on the survival, growth, and biochemical composition of Acropora coral recruits. Plos One 12(11):e0188568.  https://doi.org/10.1371/journal.pone.0188568 | **PHYSIOLOGY** | **HEXACORALLIA** | **SCLERACTINIA** | *Acropora hyacinthus*; *Acropora loripes*; *Acropora millepora*; *Acropora tenuis* |
| --- | --- | --- | --- | --- |
| Dalby JE (1992) Prey on the sea anemone *Stomphia didemon* (Anthozoa: Actiniaria) on the West Coast of Canada. Can Field-Naturalist 10(3):403–404. | **FEEDING BEHAVIOR** | **HEXACORALLIA** | **ACTINIARIA** | *Stomphia didemon* |
| Daly M, Perissinotto R, Laird M, Dyer D, Todaro A (2012) Description and ecology of a new species of *Edwardsia* de Quatrefages, 1842 (Anthozoa, Actiniaria) from the St Lucia Estuary, South Africa. Mar Biol Res 8(3):233–245. https://doi.org/10.1080/17451000.2011.617757 | **FEEDING BEHAVIOR/FEEDING HABITS/ECOLOGY** | **HEXACORALLIA** | **ACTINIARIA** | *Edwardsia isimangaliso* sp. |
| De Santana EFC, Alves AL, Santos ADM, Cunha MDGGS, Perez CD, Gomes PB (2014) Trophic ecology of the zoanthid *Palythoa caribaeorum* (Cnidaria: Anthozoa) on tropical reefs. J Mar Biol Assoc UK 95(02):301–309. https://doi.org/10.1017/s0025315414001726 | **FEEDING HABITS/ECOLOGY** | **HEXACORALLIA** | **ZOANTHARIA** | *Palythoa caribaeorum* |
| Del Valle JC, Acuña FH, López Mañanes AA (2015) Digestive flexibility in response to environmental salinity and temperature in the nonsymbiotic sea anemone *Bunodosoma zamponi*i. Hydrobiologia 759(1):189–199. | **PHYSIOLOGY** | **HEXACORALLIA** | **ACTINIARIA** | *Bunodosoma zamponi* |
| DiSalvo LH (1971) Ingestion and assimilation of bacteria by two scleractinian coral species. In: Lenhoff HW, Muscatine L, Davis LV (eds) Experimental coelenterate biology. University of Hawaii Press, Honolulu, pp 129–136. | **PHYSIOLOGY** | **HEXACORALLIA** | **SCLERACTINIA** | *Lobactis scutaria* |
| Durden JM, Bett BJ, Ruhl HA (2015) The hemisessile lifestyle and feeding strategies of *Losactis vagabunda* (Actiniaria, Iosactiidae), a dominant megafaunal species of the Porcupine Abyssal Plain. Deep-Sea Research Part I: Oceanographic Research Papers 102:72–77.  https://doi.org/10.1016/j.dsr.2015.04.010 | **FEEDING BEHAVIOR** | **HEXACORALLIA** | **ACTINIARIA** | *Losactis vagabunda* |
| Eleftheriou A, Basford DJ (1983) The general behaviour and feeding of *Cerianthus lloydIi* Gosse (Anthozoa, Coelenterata). Cah Biol Mar 24:147–158. | **FEEDING BEHAVIOR/FEEDING HABITS/ECOLOGY** | **CERIANTHARIA** | **SPIRULARIA** | *Cerianthus lloydii* |

| Fabricius K, Benayahu Y, Genin A (1995) Herbivory in asymbiotic soft corals. Science 286:90–92. https://doi.org/10.1126/science.268.5207.90 | **FEEDING HABITS/ECOLOGY** | **OCTOCORALLIA** | **ALCYONACEA** | *Dendronephthya hemprichi* |
| --- | --- | --- | --- | --- |
| Farrant PA, Borowitzka MA, Hinde R, King RJ (1987) Nutrition of the temperate Australian soft coral *Capnella gaboensis*. Mar Biol 95(4):575–581. https://doi.org/10.1007/bf00393101 | **PHYSIOLOGY** | **OCTOCORALLIA** | **ALCYONACEA** | *Capnella gaboensis* |
| Ferrier-Pagès C, Witting J, Tambutté E, Sebens KP (2003) Effect of natural zooplankton feeding on the tissue and skeletal growth of the scleractinian coral *Stylophora pistillata*. Coral Reefs 22(3):229–240. | **PHYSIOLOGY** | **HEXACORALLIA** | **SCLERACTINIA** | *Stylophora pistillata* |
| Garrabou J (1999) Life-history traits of *Alcyonium acaule* and *Parazoanthus axinellae* (Cnidaria, Anthozoa), with emphasis on growth. Mar Ecol Prog Ser 178:193–204. | **FEEDING HABITS/ECOLOGY** | **OCTOCORALLIA** | **ALCYONACEA** | *Alcyonium acaule* |
| **FEEDING HABITS/ECOLOGY** | **HEXACORALLIA** | **ZOANTHARIA** | *Parazoanthus axinellae* |
| Goldberg WM (2002) Gastrodermal structure and feeding responses in the scleractinian *Mycetophyllia reesi*, a coral with novel digestive filaments. Tissue & Cell 34(4):246–261. https://doi.org/10.1016/s0040-8166(02)00008-3 | **PHYSIOLOGY** | **HEXACORALLIA** | **SCLERACTINIA** | *Mycetophyllia reesi* |
| Goldberg WM (2002) Feeding behavior, epidermal structure and mucus cytochemistry of the scleractinian *Mycetophyllia reesi*, a coral without tentacles. Tissue & Cell 34(4):232–245. https://doi.org/10.1016/s0040-8166(02)00009-5 | **FEEDING BEHAVIOR/PHYSIOLOGY** | **HEXACORALLIA** | **SCLERACTINIA** | *Mycetophyllia reesi* |
| Gomes PB, Lira AKF, Naud J-F, Santos AM, Pérez CD (2012) Prey selectivity of the octocoral *Carijoa riisei* at Pernambuco, Brazil. An Acad Bras Ciênc 84(1):157–164. | **FEEDING BEHAVIOR** | **OCTOCORALLIA** | **ALCYONACEA** | *Carijoa riisei* |
| Goreau TF, Goreau NI, Yonge CM (1971) Reef corals: autotrophs or heterotrophs? Biol Bull 141:247–260. | **FEEDING HABITS/ECOLOGY** | **OCTOCORALLIA** | **ALCYONACEA** | *Briareum hamrum*; *Xenia hicksoni* |
| **FEEDING HABITS/ECOLOGY** | **HEXACORALLIA** | **ZOANTHARIA** | *Zoanthus sociatus* |
| **FEEDING HABITS/ECOLOGY** | **HEXACORALLIA** | **SCLERACTINIA** | *Lobactis scutaria* |

| Gori A, Reynaud S, Orejas C, Ferrier-Pagès C (2015) The influence of flow velocity and temperature on zooplankton capture rates by the cold-water coral *Dendrophyllia cornigera*. J Exp Mar Biol Ecol 466:92–97. https://doi.org/10.1016/j.jembe.2015.02.004 | **FEEDING BEHAVIOR** | **HEXACORALLIA** | **SCLERACTINIA** | *Dendrophyllia cornigera* |
| --- | --- | --- | --- | --- |
| Griffiths RJ (1977) Temperature acclimation in *Actinia equina L.* (Anthozoa). J Exp Mar Biol Ecol 28(3):285–292. https://doi.org/10.1016/0022- 0981(77)90097-1 | **PHYSIOLOGY** | **HEXACORALLIA** | **ACTINIARIA** | *Actinia equina* |
| Grigg RW (1965) Ecological studies of black coral in Hawaii. Pucif Sci 19:244–260. | **FEEDING HABITS/ECOLOGY** | **HEXACORALLIA** | **SCLERACTINIA** | *Acropora grandis* |
| Grover R, Maguer J-F, Reynaud-Vaganay S, Ferrier-Pagès C (2002) Uptake of ammonium by the scleractinian coral *Stylophora pistillata*: Effect of feeding, light, and ammonium concentrations. Limnol Oceanogr 47(3):782–790.  https://doi.org/10.4319/lo.2002.47.3.0782 | **PHYSIOLOGY** | **HEXACORALLIA** | **SCLERACTINIA** | *Stylophora pistillata* |
| Hamner WM, Dunn DF (1980) Tropical *Corallimorpharia* (Coelenterata: Anthozoa): feeding by envelopment. Micronesica 16(1):37–41. | **FEEDING BEHAVIOR** | **HEXACORALLIA** | **CORALLIMORPHARIA** | *Amplexidiscus fenestrafer* |
| Hartog JC den (1986) The queen scallop, *Chlamys opercularis* (L., 1758) (Bivalvia, Pectinidae), as a food item of the sea anemone *Urticina eques* (Gosse, 1860) (Actiniaria, Actiniidae). Basteria 50:87–92. | **FEEDING HABITS/ECOLOGY** | **HEXACORALLIA** | **ACTINIARIA** | *Urticina eques* |
| Herndl GJ, Velimirov B (1985) Bacteria in the coelenteron of Anthozoa: control of coelenteric bacterial density by the coelenteric fluid. J Exp Mar Biol Ecol 93:115–130. https://doi.org/10.1016/0022-0981(85)90153-4 | **PHYSIOLOGY** | **HEXACORALLIA** | **ACTINIARIA** | *Anemonia sulcata*; *Stoichactis giganteum* |
| **PHYSIOLOGY** | **HEXACORALLIA** | **SCLERACTINIA** | *Leptopsammia pruvoti*; *Cladocora caespitosa* |
| **PHYSIOLOGY** | **HEXACORALLIA** | **ZOANTHARIA** | *Parazoanthus axinellae* |
| Herndl GJ, Velimirov B, Krauss RE (1985) Heterotrophic nutrition and control of bacterial density in the coelenteron of the giant sea anemone *Stoichactis giganteum*. Mar Ecol Prog Ser 22(1):101–105. | **PHYSIOLOGY** | **HEXACORALLIA** | **ACTINIARIA** | *Stoichactis giganteum* |
| Hii Y-S, Soo C-L, Liew H-C (2008) Feeding of scleractinian coral, *Galaxea fascicularis*, on Artemia salina nauplii in captivity. Aquacult Int 17(4):363–376. https://doi.org/10.1007/s10499-008-9208-4 | **FEEDING BEHAVIOR** | **HEXACORALLIA** | **SCLERACTINIA** | *Galaxea fascicularis* |

| Hoeksema BW, Waheed Z (2012) It pays to have a big mouth: mushroom corals ingesting salps at northwest Borneo. Mar Biodivers 42(2):297 302.  https://doi.org/10.1007/s12526-012-0110-y | **FEEDING BEHAVIOR/FEEDING HABITS/ECOLOGY** | **HEXACORALLIA** | **SCLERACTINIA** | *Ctenactis albitentaculata*; *Ctenactis echinata*; *Ctenactis crassa*; *Cycloseris costulata*; *Cycloseris cyclolites*; *Cycloseris fragilis*; *Cycloseris mokai*; *Cycloseris sinensis*; *Cycloseris somervillei*; *Cycloseris tenuis*; *Danafungia horrida*; *Danafungia scruposa*; *Fungia fungites*; *Halomitra pileus*; *Heliofungia actiniformis*; *Herpolitha limax*; *Lithophyllon concinna*; *Lithophyllon repanda*; *Lithophyllon scabra*; *Lithophyllon spinifer*; *Lithophyllon undulatum*; *Lobactis scutaria*; *Pleuractis granulosa*; *Pleuractis gravis*; *Pleuractis moluccensis*; *Pleuractis paumotensis*; *Pleuractis taiwanensis*; *Podabacia crustacea*; *Podabacia motuporensis*; *Podabacia sinai*; *Polyphyllia talpina*; *Sandalolitha dentata*; *Sandalolitha robusta*; *Zoopilus echinatus* |
| --- | --- | --- | --- | --- |
| Hoeksema BW, Tuti Y, Becking LE (2014) Mixed medusivory by the sea anemone *Entacmaea medusivora* (Anthozoa: Actiniaria) in Kakaban Lake, Indonesia. Mar Biodivers 45(2):141–142. https://doi.org/10.1007/s12526-014-0233-4 | **FEEDING BEHAVIOR/FEEDING HABITS/ECOLOGY** | **HEXACORALLIA** | **ACTINIARIA** | *Entacmaea medusivora* |
| Höfer J, González HE, Laudien J, Schmidt GM, Häussermann V, Richter C (2018) All you can eat: the functional response of the cold-water coral *Desmophyllum dianthus* feeding on krill and copepods. PeerJ 6:e5872.  https://doi.org/10.7717/peerj.5872 | **FEEDING BEHAVIOR** | **HEXACORALLIA** | **SCLERACTINIA** | *Desmophyllum dianthus* |
| Houlbrèque F, Tambutté E, Richard C, Ferrier-Pagès C (2004) Importance of a micro diet for scleractinian corals. Mar Ecol Prog Ser 282:151–160. | **FEEDING BEHAVIOR/FEEDING HABITS/ECOLOGY** | **HEXACORALLIA** | **SCLERACTINIA** | *Stylophora pistillata*; *Galaxea fascicularis*; *Tubastrea aurea* |
| Ishida J (1936) Digestive enzymes of *Actinia mesembryanthemum*. Annot zool jap 15: 285–305. | **PHYSIOLOGY** | **HEXACORALLIA** | **ACTINIARIA** | *Actinia mesembryanthemum* |
| Ivanova NY, Grebelnyi SD (2016) On the food of the Antarctic sea anemone *Urticinopsis antarctica* Carlgren, 1927 (Actiniidae, Actiniaria, Anthozoa). J Mar Biol Assoc UK 97:29–34.  https://doi.org/10.1017/s0025315415002131 | **FEEDING HABITS/ECOLOGY** | **HEXACORALLIA** | **ACTINIARIA** | *Urticinopsis antarctica* |
| Jarms G, Tiemann H (2004) *Actinostola callosa* (Verrill, 1882) (Actinostolidae, Anthozoa), a medusivorous sea anemone and its mass occurrence in the Lurefjord, Norway. Helgol Mar Res 58(1):15–17. https://doi.org/10.1007/s10152-003-0158-y | **FEEDING BEHAVIOR** | **HEXACORALLIA** | **ACTINIARIA** | *Actinostola callosa* |
| Johannes RE, Coles SL, Kuenzel NT (1970) The role of zooplankton in the nutrition of some scleractinian corals. Limnol Oceanogr 15(4):579–586.  https://doi.org/10.4319/lo.1970.15.4.0579 | **PHYSIOLOGY/FEEDING HABITS/ECOLOGY** | **HEXACORALLIA** | **SCLERACTINIA** | *Diploria strigosa*; *Diploria labyrinthiformis*; *Porites astreoides*; *Montastrea annularis* |
| Johannes RE, Tepley L (1974) Examination of feeding of the reef coral *Porites lobata* in situ using time lapse photography. Proc. Second Int. Coral Reef Symp 1:127–131. | **FEEDING BEHAVIOR** | **HEXACORALLIA** | **SCLERACTINIA** | *Porites lobata* |

| Johnson AS, Sebens KP (1993) Consequences of a flattened morphology: effects of flow on feeding rates of the scleractinian coral *Meandrina meandrites.* Mar Ecol Prog Ser 99:99–114. | **FEEDING BEHAVIOR** | **HEXACORALLIA** | **SCLERACTINIA** | *Meandrina meandrites* |
| --- | --- | --- | --- | --- |
| Kim K, Lasker HR (1997) Flow-mediated resource competition in the suspension feeding gorgonian *Plexaura homomalla* (Esper). J Exp Mar Biol Ecol 215(1):49–64. https://doi.org/10.1016/s0022-  0981(97)00015-41 | **FEEDING HABITS/ECOLOGY** | **OCTOCORALLIA** | **ALCYONACEA** | *Plexaura homomalla* |
| Kostina EE, Tsurpalo AP, Frolova LT (2006) Features of biology of the sea anemone *Charisea saxicola* Torrey, 1902 (Actiniaria: Condylanthidae) from the northwest Pacific. Russ J Mar Biol 32: 214–222. https://doi.org/10.1134/S106307400604002X | **FEEDING HABITS/ECOLOGY** | **HEXACORALLIA** | **ACTINIARIA** | *Charisea saxicola* |
| Krijgsman BJ, Talbot FH (1953) Experiments on digestion in sea anemones. Arch Int Physiol 61(3):277–294. https://doi.org/10.3109/13813455309144314 | **PHYSIOLOGY** | **HEXACORALLIA** | **ACTINIARIA** | *Pseudactinia flagellifera* |
| Kruger LM, Griffiths CL (1997) Digestion rates of prey eaten by intertidal sea anemones from the south-western Cape, South Africa. S Afr J Zool 32(4):101–105. https://doi.org/10.1080/02541858.1997.11448439 | **FEEDING BEHAVIOR/FEEDING HABITS/ECOLOGY** | **HEXACORALLIA** | **ACTINIARIA** | *Actinia equina*; *Anthothoe stimpsoni*; *Anthopleura michaelseni*; *Bunodosoma capensis*; *Pseudactinia flagellifera*; *Pseudactinia varia*; *Bunodactis reynaudi* |
| Kuanuia P, Chavanicha S, Viyakarna V, Parkb HS, Omori M (2016) Feeding behaviors of three tropical scleractinian corals in captivity. Trop Zool 29(1):1–9. | **FEEDING BEHAVIOR** | **HEXACORALLIA** | **SCLERACTINIA** | *Pocillopora damicornis*; *Acropora millepora*; Acropora nobilis |
| Lampitt RS, Paterson GLJ (1987) The feeding behaviour of an abyssal sea anemone from in situ time lapse photographs and trawl samples. Oceanol Acta 10(4):455–461. | **FEEDING BEHAVIOR** | **HEXACORALLIA** | **ACTINIARIA** | *Sicyonis tuberculata* |

| Lasker HR (1976) Intraspecific variability of zooplankton feeding in the hermatypic coral *Montastrea cavernosa*. In: Coelenterate ecology and behavior, pp 101–109. | **FEEDING BEHAVIOR/FEEDING HABITS/ECOLOGY** | **HEXACORALLIA** | **SCLERACTINIA** | *Montastrea cavernosa* |
| --- | --- | --- | --- | --- |
| Lasker HR (1981) A comparison of the particulate feeding abilities of three species of gorgonian soft coral. Mar Ecol Prog Ser 5:61–67. | **FEEDING BEHAVIOR** | **OCTOCORALLIA** | **ALCYONACEA** | *Briareum asbestinum*; *Antillogorgia americana*; *Pseudoplexaura porosa* |
| Lasker HR, Gottfried MD, Coffroth MA (1983) Effects of depth on the feeding capabilities of two octocorals. Mar Biol 73:73–78.  https://doi.org/10.1007/bf00396287 | **FEEDING BEHAVIOR/FEEDING HABITS/ECOLOGY** | **OCTOCORALLIA** | **ALCYONACEA** | *Plexaura homomalla* |
| Leversee GJ (1976) Flow and feeding in fan- shaped colonies of the gorgonian coral, *Leptogorgia*. Biol Bull 151(2):344–356.  https://doi.org/10.2307/1540667 | **FEEDING BEHAVIOR** | **OCTOCORALLIA** | **ALCYONACEA** | *Leptogorgia virgulata* |
| Lewis JB, Price WS (1975) Feeding mechanisms and feeding strategies of Atlantic reef corals. J Zool 176:527–544.  https://doi.org/10.1111/j.1469-7998.1975.tb03219.x | **FEEDING BEHAVIOR** | **HEXACORALLIA** | **SCLERACTINIA** | *Siderastrea siderea* |
| **FEEDING BEHAVIOR** | **OCTOCORALLIA** | **ALCYONACEA** | *Plexaura homomalla* |
| Lewis JB (1978) Feeding mechanisms in black corals (Antipatharia). J Zool 186:393–396. | **FEEDING BEHAVIOR** | **HEXACORALLIA** | **ANTIPHATARIA** | *Stichopathes lutkeni*; *Antipathes pennacea*; *Antipathes* sp*.* |
| Lewis JB (1982) Feeding behaviour and feeding ecology of the Octocorallia (Coelenterata: Anthozoa). J Zool Lond 196:371–384.  https://doi.org/10.1111/j.1469-7998.1982.tb03509.x | **FEEDING BEHAVIOR/FEEDING HABITS/ECOLOGY** | **OCTOCORALLIA** | **ALCYONACEA** | *Cladiella sphaerophora*; *Lobophytum crassum*; *Sarcophyton trocheliophorum*; *Sinularia densa*; *Sinularia microspiculata*; *Sinularia capillosa*; *Sinularia microclavata*; *Sinularia inelegans*; *Sinularia firma*; *Sinularia* n. sp.; *Capnella lacertiliensis*; *Dendronephthya* sp.; *Lemnalia* sp.; *Paralemnalia digitiformis*; *Eflatournaria* sp.; *Xenia elongata*; *Heteroxenia elisabethae*; *Isis hippuris*; *Rumphella aggregata*; *Junceella fragilis*; *Subergorgia reticulata*; *Briareum asbestinum*; *Eunicea tourneforti*; *Antillogorgia americana*; *Antillogorgia acerosa*; *Muriceopsis flavida*; *Eunicea flexuosa*; *Gorgonia ventalina*; *Carijoa riisei*; *Tubipora musica* |
| Lindstedt KJ, Muscatine L, Lenhoff HM (1968) Valine activation of feeding in the sea anemone *Boloceroides*. Comp Biochem Physiol 26:567–572. https://doi.org/10.1016/0010-  406x(68)90650-6 | **PHYSIOLOGY** | **HEXACORALLIA** | **ACTINIARIA** | *Boloceroides* sp. |

| Lindstedt KJ (1971) Biphasic feeding response in a sea anemone: control by asparagine and glutathione. Science 173(3994):333–334.  https://doi.org/10.1126/science.173.3994.333 | **PHYSIOLOGY** | **HEXACORALLIA** | **ACTINIARIA** | *Anthopleura elegantissima* |
| --- | --- | --- | --- | --- |
| Lira AKF, Naud JP, Gomez PB et al (2009) Trophic ecology of the octocoral *Carijoa riisei* from littoral of Pernambuco, Brazil. Composition and spatio-temporal variation of the diet. J Mar Biol Assoc UK 89:89–99. | **FEEDING HABITS/ECOLOGY** | **OCTOCORALLIA** | **ALCYONACEA** | *Carijoa riisei* |
| Mariscal RN, Lenhoff HM (1968) The chemical control of feeding behaviour in *Cyphastrea ocellina* and in some other Hawaiian corals. J Exp Biol 49:689–699. | **FEEDING BEHAVIOR/PHYSIOLOGY** | **HEXACORALLIA** | **SCLERACTINIA** | *Cyphastrea ocellina* and other Hawaiian corals |
| McFarlane IS (1970) Control of preparatory feeding behaviour in the sea anemone *Tealia feline*. J Exp Biol 53:211–220. | **FEEDING BEHAVIOR** | **HEXACORALLIA** | **ACTINIARIA** | *Tealia felina* |
| Migne A, Davoult D (2002) Experimental nutrition in the soft coral *Alcyonium digitatum* (Linnaeus, 1758). Cah Biol Mar 43:9–16. | **FEEDING BEHAVIOR/PHYSIOLOGY** | **OCTOCORALLIA** | **ALCYONACEA** | *Alcyonium digitatum* |
| Minchin D (1983) Predation on young *Pecten maximus* (L.) (Bivalvia), by the anemone *Anthopleura ballii* (Cocks). J Mollus Stud 49:228–231. | **FEEDING HABITS/ECOLOGY** | **HEXACORALLIA** | **ACTINIARIA** | *Anthopleura ballii* |
| Möller H (1978) Investigations on the feeding ecology of *Anemonia sulcata*. Zool Anz 200:369–373. | **FEEDING HABITS/ECOLOGY** | **HEXACORALLIA** | **ACTINIARIA** | *Anemonia sulcata* |
| Mueller CE, Larsson AI, Veuger B, Middelburg JJ, van Oevelen D (2014) Opportunistic feeding on various organic food sources by the cold-water coral Lophelia pertusa. Biogeosciences 11:123–133. https://doi.org/10.5194/bg-11-123-2014 | **PHYSIOLOGY** | **HEXACORALLIA** | **SCLERACTINIA** | *Lophelia pertusa* |
| Muller-Parker G (1985) Effect of feeding regime and irradiance on the photophysiology of the symbiotic sea anemone *Aiptasia pulchella.* Mar Biol 90(1):65–74. https://doi.org/10.1007/bf00428216 | **FEEDING BEHAVIOR/PHYSIOLOGY** | **HEXACORALLIA** | **ACTINIARIA** | *Aiptasia pulchella* |
| Murdock GR (1978a) Circulation and digestion of food in the gastrovascular system of gorgonian octocorals (Cnidaria; Anthozoa). Bull Mar Sci 28(2):363–370. | **PHYSIOLOGY** | **OCTOCORALLIA** | **ALCYONACEA** | *Rhytisma fulvum* |

| Murdock GR (1978b) Digestion, assimilation, and transport of food in the gastrovascular cavity of a gorgonian octocoral (Cnidaria, Anthozoa). Bull Mar Sci 28(2):354–362. | **PHYSIOLOGY** | **OCTOCORALLIA** | **ALCYONACEA** | *Rhytisma fulvum* |
| --- | --- | --- | --- | --- |
| Muscatine L, Porter JW (1977) Reef corals: mutualistic symbioses adapted to nutrient-poor environments. Bioscience 27(7):454–460. | **FEEDING HABITS/ECOLOGY** | **HEXACORALLIA** | **SCLERACTINIA** | *Montastrea cavernosa* |
| Naumann MS, Orejas C, Wild C, Ferrier-Pagès C (2011) First evidence for zooplankton feeding sustaining key physiological processes in a scleractinian cold-water coral. J Exp Biol 214(21):3570–3576. https://doi.org/10.1242/jeb.061390 | **PHYSIOLOGY** | **HEXACORALLIA** | **SCLERACTINIA** | *Desmophyllum dianthus* |
| Navarro E, Ortega MM, Madariaga J (1981) Effect of body size, temperature and shore level on aquatic and aerial respiration of *Actinia equina* (Anthozoa). J Exp Mar Biol Ecol 53(2-3):153–162.  https://doi.org/10.1016/0022-0981(81)90016-2 | **PHYSIOLOGY/FEEDING HABITS/ECOLOGY** | **HEXACORALLIA** | **ACTINIARIA** | *Actinia equina* |
| Nicol JAC (1959) Digestion in sea anemones. J Mar Biol Assoc UK 38(03):469–476.  https://doi.org/10.1017/s0025315400006895 | **PHYSIOLOGY** | **HEXACORALLIA** | **ACTINIARIA** | *Calliactis parasitica* |
| Orejas C, Gili JM, López-González PJ, Arntz W (2001) Feeding strategies and diet composition of four Antarctic cnidarian species. Polar Biol 24(8):620–627. https://doi.org/10.1007/s003000100272 | **FEEDING BEHAVIOR/FEEDING HABITS/ECOLOGY** | **OCTOCORALLIA** | **ALCYONACEA** | *Anthomastus bathyproctus*; *Clavularia frankliniana* |
| Orejas C, Gili JM, Arntz W (2003) Role of small-plankton communities in the diet of two Antartic octocorals (*Primnoisis antartica* and *Primnoella s*p.). Mar Ecol Prog Ser 250:105–116. | **FEEDING HABITS/ECOLOGY** | **OCTOCORALLIA** | **ALCYONACEA** | *Primnoisis antarctica*; *Primnoella* sp. |
| Ormond RF, Caldwell S (1982) The effect of oil pollution on the reproduction and feeding behaviour of the sea anemone *Actinia equina*. Mar Pollut Bull 13(4):118–122. https://doi.org/10.1016/0025-326x(82)90367-8 | **FEEDING BEHAVIOR/PHYSIOLOGY** | **HEXACORALLIA** | **ACTINIARIA** | *Actinia equina* |
| Osinga R, Van Delft S, Lewaru MW, Janse M, Verreth JAJ (2011) Determination of prey capture rates in the stony coral *Galaxea fascicularis*: a critical reconsideration of the clearance rate concept. J Mar Biol Assoc UK 92(04):713–719.  https://doi.org/10.1017/s0025315411001214 | **FEEDING BEHAVIOR** | **HEXACORALLIA** | **SCLERACTINIA** | *Galaxea fascicularis* |

| Palardy JE, Grottoli AG, Matthews KA (2005) Effects of upwelling, depth, morphology and polyp size on feeding in three species of Panamanian corals. Mar Ecol Prog Ser 300:70–89. | **FEEDING BEHAVIOR/FEEDING HABITS/ECOLOGY** | **HEXACORALLIA** | **SCLERACTINIA** | *Pocillopora damicornis*; *Pavona clavus*; *Pavona gigantea* |
| --- | --- | --- | --- | --- |
| Palardy JE, Grottoli AG, Matthews KA (2006) Effect of naturally changing zooplankton concentrations on feeding rates of two coral species in the Eastern Pacific. J Exp Mar Biol Ecol 331(1):99–107. | **FEEDING BEHAVIOR/FEEDING HABITS/ECOLOGY** | **HEXACORALLIA** | **SCLERACTINIA** | *Pocillopora damicornis*; *Pavona gigantea* |
| Pantin AMP, Pantin CFA (1943) The stimulus to feeding in *Anemonia sulcata*. J Exp Biol 20:6–13. | **FEEDING BEHAVIOR/PHYSIOLOGY** | **HEXACORALLIA** | **ACTINIARIA** | *Anemonia sulcata* |
| Parker GH (1896) The reactions of *Metridium* to food and other substances. Bull Mus Comp Zool 29:107–119. | **FEEDING BEHAVIOR/PHYSIOLOGY** | **HEXACORALLIA** | **ACTINIARIA** | *Metridium* |
| Parker GH (1917) Actinian behaviour. J Exp Biol 22:193–219. | **FEEDING BEHAVIOR** | **HEXACORALLIA** | **ACTINIARIA** |  |
| Patterson MR (1991) Passive suspension feeding by an octocoral in plankton patches: empirical test of a mathematical model. Biol Bull 180(1):81–92. https://doi.org/10.2307/1542431 | **FEEDING BEHAVIOR** | **OCTOCORALLIA** | **ALCYONACEA** | *Alcyonium siderium* |
| Porter JW (1974) Zooplankton feeding by the Caribbean reef-building coral *Montastrea cavernosa*. Proceedings of the Second International Symposium on Coral Reefs 1:111–125. | **FEEDING BEHAVIOR/FEEDING HABITS/ECOLOGY** | **HEXACORALLIA** | **SCLERACTINIA** | *Montastrea cavernosa* |
| Pratt EM (1905) The digestive organs of the *Alcyonaria* and their relation to the mesogleeal cell plexus. Q J Micros Sci 49:327–362. | **PHYSIOLOGY** | **OCTOCORALLIA** | **ALCYONACEA** | Alcyonaria |

| Price WS (1973) Aspects of feeding behaviour of West Indian reef corals. Dissertation, McGill University. | **FEEDING BEHAVIOR** | **HEXACORALLIA** | **SCLERACTINIA** | *Porites porites*; *Porites astreoides*; *Madracis mirabilis*; *Eusmilia fastigiata*; *Montastrea cavernosa*; *Mussa angulosa*; *Isophyllia multiflora*; *Dichocoenia stokesi*; *Favia fragum*; *Stephanocoenia michelini*; *Colpophyllia* sp.; *Diploria clivosa*; *Diploria strigosa*; *Diploria labyrinthiformis*; *Mycetophyllia lamarckiana*; *Siderastrea siderea*; *Siderastrea radians*; *Agaricia agaricites*; *Agaricia lamarcki*; *Helioseris cuculata*; *Mycetophyllia danaana*; *Mycetophyllia* sp.; *Mycetophyllia ferox*; *Montastrea annularis*; *Acropora palmata*; *Acropora cervicornis*; *Dendrogyra cylindrus*; *Meandrina meandrites* |
| --- | --- | --- | --- | --- |
| Price WS, Lewis JJ (1975) Feeding mechanisms and feeding strategies of Atlantic reef corals. Jour Zool 176:527–544. | **FEEDING BEHAVIOR** | **HEXACORALLIA** | **SCLERACTINIA** | *Stephanocoenia michelinii*; *Madracis mirabilis*; *Madracis decatis*; *Acropora palmata*; *Acropora cervicornis*; *Agaricia agaricites*; *Agaricia lamarcki*; *Helioseris circullata*; *Siderastrea siderea*; *Siderastrea radians*; *Porites astreoides*; *Porites porites*; *Porites furcata*; *Porites divaricata*; *Favia fragum*; *Diploria clivosa*; *Diploria strigosa*; *Diploria labyrinthiformis*; *Manicina areolata*; *Colpophyllia natans*; *Montastrea annularis*; *Montastrea cavernosa*; *Meandrina meandrites*; *Dichocoenia stokesi*; *Dichocoenia stellaris*; *Dendrogyra cylindrus*; *Mussa angulosa*; *Scolymia lacera*; *Isophyllia sinuosa*; *Isophyllia multiflora*; *Isophyllastrea rígida*; *Mycetophyllia lamarckiana*; *Mycetophyllia danaana*; *Mycetophyllia ferox*; *Eusmilia fastigiate* |
| Purcell JE (1977) The diet of large and small individuals of the sea anemone *Metridium senile*. Bull South Calif Acad Sci 76:168–172. | **FEEDING HABITS/ECOLOGY** | **HEXACORALLIA** | **ACTINIARIA** | *Metridium senile* |
| Purser A, Larsson AI, Thomsen L, van Oevelen D (2010) The influence of flow velocity and food concentration on *Lophelia pertusa* (Scleractinia) zooplankton capture rates. J Exp Mar Biol Ecol 395(1-2):55–62. https://doi.org/10.1016/j.jembe.2010.08.013 | **FEEDING BEHAVIOR** | **HEXACORALLIA** | **SCLERACTINIA** | *Lophelia pertusa* |

| Quesada AJ, Acuña FH, Cortés J (2014) Diet of the sea anemone *Anthopleura nigrescens*: composition and variation between daytime and nighttime high tides. Zool Stud 53:26.  https://doi.org/10.1186/s40555-014-0026-2 | **FEEDING HABITS/ECOLOGY** | **HEXACORALLIA** | **ACTINIARIA** | *Anthopleura nigrescens* |
| --- | --- | --- | --- | --- |
| Raz-Bahat M, Douek J, Moiseeva E, Peters EC, Rinkevich B (2017) The digestive system of the stony coral *Stylophora pistillata*. Cell Tissue Res 368(2):311–323. https://doi.org/10.1007/s00441-016-2555Y | **PHYSIOLOGY** | **HEXACORALLIA** | **SCLERACTINIA** | *Stylophora pistillata* |
| Reimer AA (1971a) Chemical control of feeding behavior and role glycine in the nutrition of *Zoanthus* (Coelenterata, Zoanthidea). Comp Biochem Physiol 39:743–759. | **FEEDING BEHAVIOR/PHYSIOLOGY** | **HEXACORALLIA** | **ZOANTHARIA** | *Zoanthus* |
| Reimer AA (1971b) Chemical control of feeding behavior in *Palythoa* (Zoanthidea, Coelenterata). Comp Biochem Physiol 40:19–38. | **FEEDING BEHAVIOR/PHYSIOLOGY** | **HEXACORALLIA** | **ZOANTHARIA** | *Palythoa* |
| Reimer AA (1971c) Feeding behavior in the Hawaiian zoanthids, Palythoa and Zoanthus. Pacif Sci 25:512–520. | **FEEDING BEHAVIOR** | **HEXACORALLIA** | **ZOANTHARIA** | *Palythoa psammophilia*; *Zoanthus pacificus* |
| Reimer AA (1971d) Specificity of feeding chemoreceptors in Palythoa psammophilia (zoanthidea, coelenterata). Comp Gen Pharmac 2(8):383–396. https://doi.org/10.1016/0010-4035(71)90034-6 | **PHYSIOLOGY** | **HEXACORALLIA** | **ZOANTHARIA** | *Palythoa psammophilia* |
| Reimer AA (1973) Feeding behavior in the Sea Anemone *Calliactis polypus* (Forskal, 1775). Comp Biochem Physiol 44:1289–1301. | **FEEDING BEHAVIOR** | **HEXACORALLIA** | **ACTINIARIA** | *Calliactis polypus* |
| Reynaud S, Martinez P, Houlbrèque F, Billy I, Allemand D, Ferrier-Pagès C (2009) Effect of light and feeding on the nitrogen isotopic composition of a zooxanthellate coral: role of nitrogen recycling. Mar Ecol Prog Ser 392:103–110. | **FEEDING HABITS/ECOLOGY** | **HEXACORALLIA** | **SCLERACTINIA** | *Stylophora pistillata* |
| Ribes M, Coma R, Gili JM (1998) Heterotrophic feeding by gorgonian corals with symbiotic zooxanthellae. Limnol Oceanogr 43:1170–1179. | **FEEDING BEHAVIOR/FEEDING HABITS/ECOLOGY** | **OCTOCORALLIA** | **ALCYONACEA** | *Eunicea flexuosa* |

| Ribes M, Coma R, Gili JM (1999) Heterogeneous feeding in benthic suspension feeders: the natural diet and grazing rate of the temperate gorgonian *Paramuricea clavata* (Cnidaria: Octocorallia) over a year cycle. Mar Ecol Prog Ser 183:125–137. | **FEEDING HABITS/ECOLOGY** | **OCTOCORALLIA** | **ALCYONACEA** | *Paramuricea clavata* |
| --- | --- | --- | --- | --- |
| Ribes M, Coma R, Rossi S (2003) Natural feeding of the temperate asymbiotic octocoral-gorgonian *Leptogorgia sarmentosa* (Cnidaria: Octocorallia). Mar Ecol Prog Ser 254:141–150. | **FEEDING HABITS/ECOLOGY** | **OCTOCORALLIA** | **ALCYONACEA** | *Leptogorgia sarmentosa* |
| Rossi S, Ribes M, Coma R, Gili JM (2004) Temporal variability in zooplankton prey capture rate of the passive suspension feeder *Leptogorgia sarmentosa* (Cnidaria: octocorallia), a case study. Mar Biol 144(1):89–99. https://doi.org/10.1007/ s00227-003-1168-7 | **FEEDING BEHAVIOR** | **OCTOCORALLIA** | **ALCYONACEA** | *Leptogorgia sarmentosa* |
| Rossi S, Gili JM, Coma R, Linares C, Gori A, Vert N (2006) Temporal variation in protein, carbohydrate, and lipid concentrations in *Paramuricea clavata* (Anthozoa, Octocorallia): evidence for summer–autumn feeding constraints. Mar Biol 149(3):643–651. https://doi.org/10.1007/s00227-005-0229-5 | **PHYSIOLOGY** | **OCTOCORALLIA** | **ALCYONACEA** | *Paramuricea clavata* |
| Schwarz J, Weis VM, Potts DC (2002) Feeding behavior and acquisition of zooxanthellae by planula larvae of the sea anemone *Anthopleura elegantissima*.Mar Biol 140(3):471–478.  https://doi.org/10.1007/s00227-001-0736-y | **FEEDING BEHAVIOR** | **HEXACORALLIA** | **ACTINIARIA** | *Anthopleura elegantissima* |
| Schlichter D (1982) Nutritional strategies of cnidarians: the absorption, translocation and utilization of dissolved nutrients by *Heteroxenia fuscescens*. Am Zool 22:659–669. | **PHYSIOLOGY** | **OCTOCORALLIA** | **ALCYONACEA** | *Heteroxenia fuscescens* |
| Sebens KP (1977) Autotrophic and heterotrophic nutrition of coral reef zoanthids. Proc Int Coral Reef Symposium, vol. 1:397–406. | **FEEDING BEHAVIOR//FEEDING HABITS/ECOLOGY** | **HEXACORALLIA** | **ZOANTHARIA** | *Palythoa variabilis*; *Palythoa caribaeorum*; *Zoanthus sociatus*; *Zoanthus solandri* |
| Sebens KP (1981) The allometry of feeding, energetics, and body size in three sea anemone species. Biol Bull 161(1):152–171. https://doi.org/10.2307/1541115 | **FEEDING BEHAVIOR/FEEDING HABITS/ECOLOGY** | **HEXACORALLIA** | **ACTINIARIA** | *Anthopleura elegantissima*; *Anthopleura xanthogrammica*; *Metridium senile* |
| Sebens KP, Koehl MAR (1984) Predation on zooplankton by the benthic anthozoans Alcyonium siderium (Alcyonacea) and Metridium senile (Actiniaria) in the New England subtidal. Mar Biol | **FEEDING BEHAVIOR//FEEDING HABITS/ECOLOGY** | **HEXACORALLIA** | **ACTINIARIA** | *Metridium senile* |

| 81(3):255–271. https://doi.org/10.1007/bf0039322 | **FEEDING BEHAVIOR//FEEDING HABITS/ECOLOGY** | **OCTOCORALLIA** | **ALCYONACEA** | *Alcyonium siderium* |
| --- | --- | --- | --- | --- |
| Sebens KP, Vandersall KS, Savina, LA, Graham KR (1996) Zooplankton capture by two scleractinian corals, *Madracis mirabilis* and *Montastrea cavernosa*, in a field enclosure. Mar Biol 127:303–317. | **FEEDING BEHAVIOR** | **HEXACORALLIA** | **SCLERACTINIA** | *Madracis mirabilis*; *Montastrea cavernosa* |
| Sebens KS, Grace SP, Helmuth B, Maney EJJr, Miles JS (1998) Water flow and prey capture by three scleractinian corals, *Madracis mirabilis*, *Montastrea cavernosa* and *Porites porites* in a field enclosure. Mar Biol 131:347–360. | **FEEDING BEHAVIOR** | **HEXACORALLIA** | **SCLERACTINIA** | *Madracis mirabilis*; *Montastrea cavernosa*; *Porites porites* |
| Sheperd SA, Gray JD (1985) Food of the anemone *Anthothoe albocincta* at West Island, South Australia. Trans R Soc S Aust 109:191–192. | **FEEDING HABITS/ECOLOGY** | **HEXACORALLIA** | **ACTINIARIA** | *Anthothoe albocincta* |
| Siebert JrAE (1974) A description of the embryology, larval development, and feeding of the sea anemones *Anthopleura elegantissima* and *A. xanthogrammica*. Can J Zool 52(11):1383–1388.  https://doi.org/10.1139/z74-1751541115 | **FEEDING BEHAVIOR** | **HEXACORALLIA** | **ACTINIARIA** | *Anthopleura elegantissima*; *Anthopleura xanthogrammica* |
| Slattery M, McClintock JB, Bowser SS (1997) Deposit feeding: a novel mode of nutrition in the Antartic colonial soft coral *Gersemia antarctica*. Mar Ecol Prog Ser 149:299–304. | **FEEDING BEHAVIOR/FEEDING HABITS/ECOLOGY** | **OCTOCORALLIA** | **ALCYONACEA** | *Gersemia antarctica* |
| Sorokin YI (1973) On the feeding of some scleractinians with bacteria and dissolved organic matter. Limnol Oceanogr 18:380–385. | **FEEDING HABITS/ECOLOGY** | **HEXACORALLIA** | **SCLERACTINIA** | *Montipora* sp.; *Pocillopora damicornis*; *Pocillopora caespitosa*; *Pocillopora damicornis*; *Pocillopora bulbosa*; *Pavona* sp.; *Acropora pulchra*; *Porites compressa* |

| Sorokin YI (1991) Biomass, metabolic rates and feeding of some common reef zoantharians and octocorals. Mar Freshwater Res 42(6):729–741.  https://doi.org/10.1071/mf9910729 | **FEEDING BEHAVIOR** | **OCTOCORALLIA** | **ALCYONACEA** | *Klyxum molle*; *Alcyonium* sp.; *Capnella* sp.; *Cladiella humesi*; *Dendronephthya gigantea*; *Lemnalia rhabdota*; *Litophyton arboreum*; *Lobophytum gazallae*; *Paralemnalia clavata*; *Sarcophyton trocheliophorum*; *Sinularia densa*; *Sinularia* sp.; *Xenia elongata*; *Melithaea hicksoni*; *Bebryce indica*; *Echinogorgia praelonga*; *Hicksonella princeps*; *Isis hippuris*; *Melithaea aurantia*; *Manela lenzii*; *Rumphella aggregata*; *Tubipora musica* |
| --- | --- | --- | --- | --- |
| **FEEDING BEHAVIOR** | **HEXACORALLIA** | **ZOANTHARIA** | *Palythoa caesia*; *Zoanthus sociatus* |
| **FEEDING BEHAVIOR** | **HEXACORALLIA** | **SCLERACTINIA** | *Stylophora pistillata* |
| Sponaugle S, LaBarbera M (1991) Drag-induced deformation: a functional feeding strategy in two species of gorgonians. J Exp Mar Biol Ecol 148(1):121–134. https://doi.org/10.1016/0022-0981(91)90151-l | **FEEDING BEHAVIOR** | **OCTOCORALLIA** | **ALCYONACEA** | *Antillogorgia acerosa*; *Antillogorgia americana* |
| Szmant-Froelich A, Pilson MEQ (1980) The effects of feeding frequency and symbiosis with zooxanthellae on the biochemical composition of *Astrangia Danae* Milne Edwards & Haime 1849. J Exp Mar Biol Ecol 48(1):85–97.  https://doi.org/10.1016/0022-0981(80)90009-X | **FEEDING HABITS/ECOLOGY** | **HEXACORALLIA** | **SCLERACTINIA** | *Astrangia danae* |
| Tremblay P, Peirano A, Ferrier-Pagès C (2011) Heterotrophy in the Mediterranean symbiotic coral *Cladocora caespitosa*: comparison with two other scleractinian species. Mar Ecol Prog Ser 422:165–177. | **PHYSIOLOGY** | **HEXACORALLIA** | **SCLERACTINIA** | *Cladocora caespitosa*; *Oculina patagonica*; *Turbinaria reniformis* |
| Trench RK (1974) Nutritional potentials in *Zoanthus sociathus* (Coelenterata, Anthozoa). Helgol Wiss Meeresunters 26:174–216.  https://doi.org/10.1007/bf01611382 | **FEEDING BEHAVIOR/PHYSIOLOGY** | **HEXACORALLIA** | **ZOANTHARIA** | *Zoanthus sociathus* |
| Tsounis G, Rossi S, Laudien J, Bramanti L, Fernández N, Gili JM, Arntz W (2005) Diet and seasonal prey capture rates in the Mediterranean red coral (*Corallium rubrum L.*). Mar Biol 149: 313–325. | **FEEDIND BEHAVIOR/FEEDING HABITS/ECOLOGY** | **OCTOCORALLIA** | **ALCYONACEA** | *Corallium rubrum* L. |

| Tsounis G, Orejas C, Reynaud S, Gili J, Allemand D, Ferrier-Pagès C (2010) Prey-capture rates in four Mediterranean cold-water corals. Mar Ecol Prog Ser 398:149–155. https://doi.org/10.3354/meps08312 | **FEEDING BEHAVIOR** | **HEXACORALLIA** | **SCLERACTINIA** | *Dendrophyllia cornigera*; *Desmophyllum cristagalli*; *Madrepora oculata*; *Lophelia pertusa* |
| --- | --- | --- | --- | --- |
| Tsuchida CB, Potts DC (1994) The effects of illumination, food and symbionts on growth of the sea anemone *Anthopleura elegantissima* (Brandt, 1835). J Exp Mar Bio Ecol 183:227–242. | **PHYSIOLOGY** | **HEXACORALLIA** | **ACTINIARIA** | *Anthopleura elegantissima* |
| Tsurpalo AP, Kostina EE (2003) Feeding characteristics of three species of intertidal sea anemones of the South Kuril Islands. Russ J Mar Biol 29(1):31–40.  https://doi.org/10.1023/a:1022823819872 | **FEEDING HABITS/ECOLOGY** | **HEXACORALLIA** | **ACTINIARIA** | *Oulactis orientalis*; *Cnidopus japonicus*; *Aulactinia* sp. |
| Van der Meij SET, Reijnen BT (2011) First observations of attempted nudibranch predation by sea anemones. Mar Biodivers 42(2):281–283. https://doi.org/10.1007/s12526-011-0097-9 | **FEEDIND BEHAVIOR/FEEDING HABITS/ECOLOGY** | **HEXACORALLIA** | **ACTINIARIA** | Edwardsiidae |
| Wijgerde T, Diantari R, Lewaru MW, Verreth JAJ, Osinga R (2011) Extracoelenteric zooplankton feeding is a key mechanism of nutrient acquisition for the scleractinian coral Galaxea fascicularis. J Exp Biol 214(20):3351–3357.  https://doi.org/10.1242/jeb.058354 | **FEEDING BEHAVIOR/PHYSIOLOGY** | **HEXACORALLIA** | **SCLERACTINIA** | *Galaxea fascicularis* |
| Williams R (1972) Chemical control of feeding behaviour in the sea anemone *Diadumene luciae* (Verrill). Comp Biochem Phys A 41(2):361–371. https://doi.org/10.1016/0300-9629(72)90067-9 | **FEEDING BEHAVIOR/PHYSIOLOGY** | **HEXACORALLIA** | **ACTINIARIA** | *Diadumene luciae* |
| Winkler LR, Tilton BE (1962) Predation on the California sea hare, *Aplysia californica* Cooper, by the solitary great green sea anemone*, Anthopleura xanthogrammica* (Brandt), and the effect of sea hare toxin and acetylcholine on anemone muscle. Pac Sci 16:286–290. | **PHYSIOLOGY/FEEDING HABITS/ECOLOGY** | **HEXACORALLIA** | **ACTINIARIA** | *Anthopleura xanthogrammica* |
| Yeo TK (1976) Observations on the feeding mechanisms of some local *Fungiidae* (Order Scleractinia). Thesis, University of Singapore. | **FEEDING BEHAVIOR** | **HEXACORALLIA** | **SCLERACTINIA** | *Fungia* sp. |

| Yonge CM (1930a) Studies on the physiology of corals: I. Feeding mechanism and food. Great Barrier Reef Expedition 1:13–57. | **FEEDING BEHAVIOR** | **HEXACORALLIA** | **SCLERACTINIA** | *Flabellum rubrum*; *Caryophyllia smithii*; *Galaxea horrescens*; *Oculina diffusa*; *Lophohelia prolifera*; *Seriatopora hystrix*; *Pocillopora bulbosa*; *Stylophora pistillata*; *Euphyllia glabrescens*; *Eusmilia fastigiata*; *Cyphastrea agassizi*; *Cyphastrea chalcidicum*; *Echinopora lamelosa*; *Galaxea fascicularis*; *Dipsastraea pallida*; *Favites* spp.; *Goniastrea* spp.; *Meandra* spp.; *Merulina ampliata*; *Hydnophora exesa*; *Pectinia lactuca*; *Manicina areolata*; *Astrangia danae*; *Caulastraea furcata*; *Acanthastrea echinata*; *Lobophyllia recta*; *Lobophyllia corymbosa*; *Trachyphyllia geoffroyi*; *Isophyllia sinuosa*; *Danafungia horrida*; *Cycloseris cyclolites*; *Lobactis scutaria*; *Heliofungia actiniformis*; *Psammocora contigua*; *Pavona danai*; *Coeloseris mayeri*; *Pachyseris speciosa*; *Agaricia agaricites*; *Siderastrea radians*; *Tubastraea micranthus*; *Balanophyllia regia*; *Astreopora ocellata*; *Turbinaria* spp.; *Montipora angulata*; *Acropora aspera*; *Goniopora tenuidens*; *Porites solida* |
| --- | --- | --- | --- | --- |
| **FEEDING BEHAVIOR** | **OCTOCORALLIA** | **ALCYONACEA** | *Heliopora*; *Tubipora* |
| Yonge CM (1930b) Studies on the physiology of corals II: Digestive enzymes, with notes on the speed of digestion. Sci Rep Great Barrier Reef Expedition 1: 59–81. | **PHYSIOLOGY** | **HEXACORALLIA** | **SCLERACTINIA** | *Danafungia horrida* |
| Zamponi MO (1979) Sobre la alimentación en Actiniaria (Coelenterata Anthozoa). Neotrópica 25(74):195–202. | **FEEDING BEHAVIOR/FEEDING HABITS/ECOLOGY** | **HEXACORALLIA** | **ACTINIARIA** | *Phymactis clematis*; *Bunodactis marplatensis* |
